# Supplementary material
Source: publisher site journal article supplement (https://www.dovepress.com/article/443169)
Supplement: Supplementary file 1 [file get_supplementary_file.php]

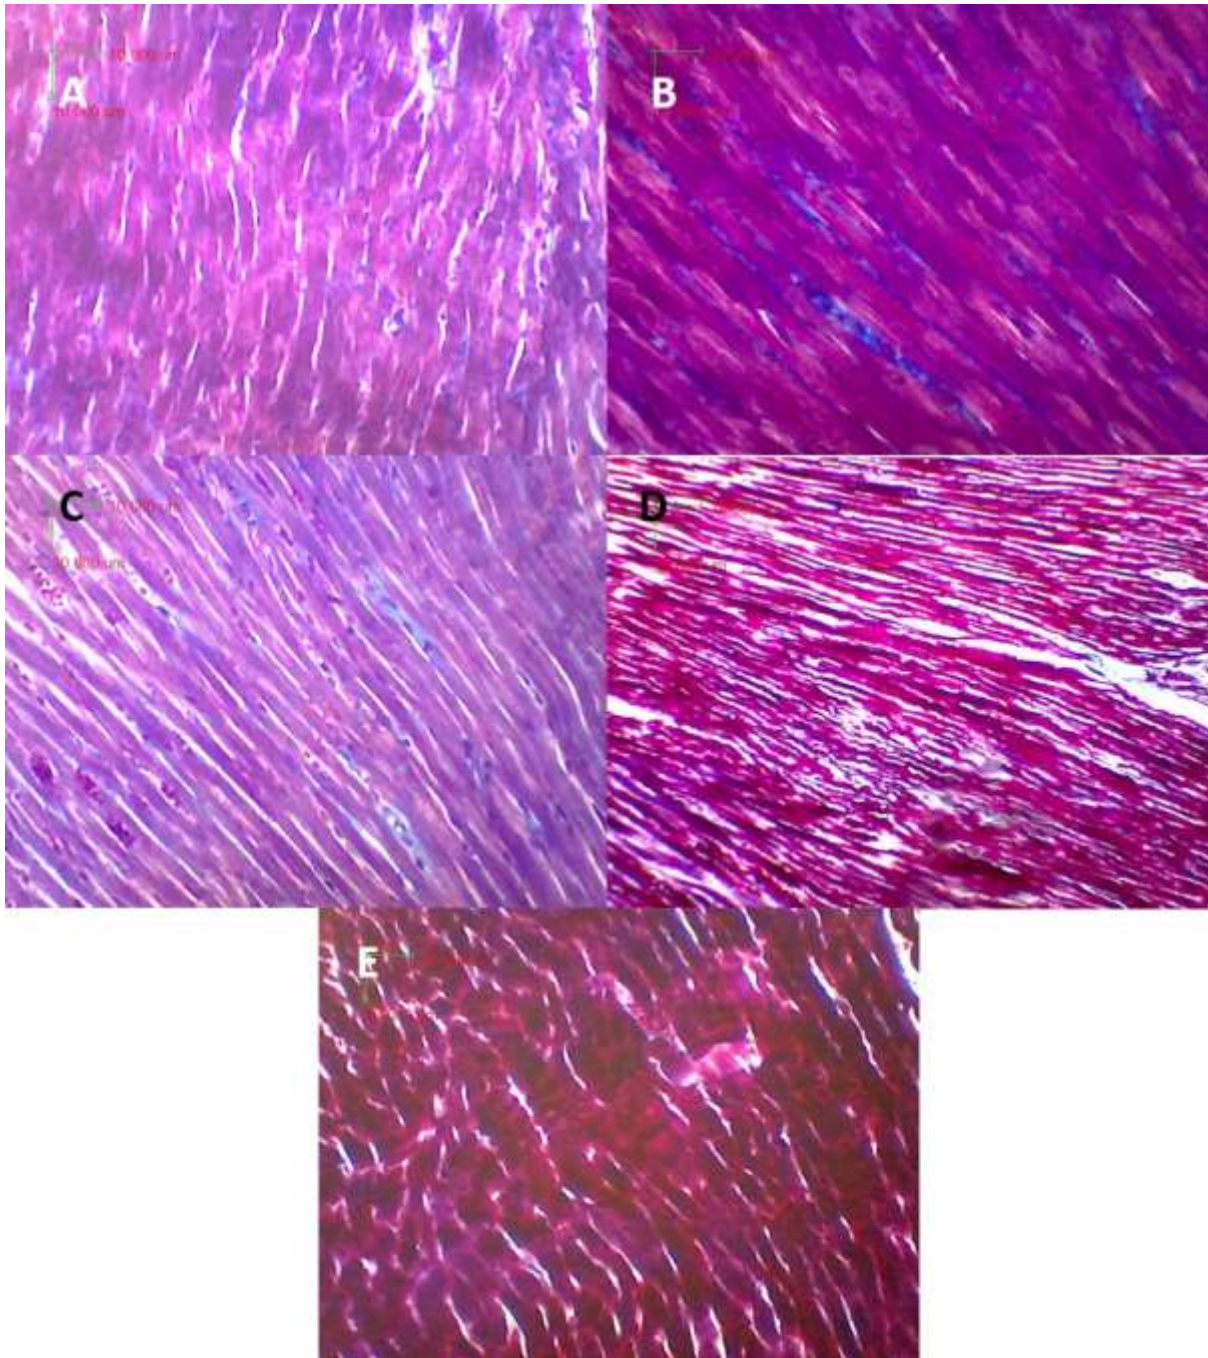

**Supplementary Figure 1** Histological slides of the longitudinal left ventricular sections of the experimental groups at high magnification (x100). The sections were stained using Mason's Trichrome stain which stains fibrotic tissue blue. A: NC group, B: DC group, C: LD group, D: HD group, E: MET group.

**Abbreviations:** NC, normal control. DC, diabetic control. LD, low dose. HD, high dose. MET, metformin.
